# Supplementary material
Source: Springer Nature journal article supplement (https://www.springermedizin.de/resource/supplementary/12245_2011_100_MOESM2_ESM.pdf/9672772)
Supplement: MOESM2 [file 9672772]

LightSpeed VCT cted

A

Ex:11151

IM: 26 SE: 2

I- BRAIN

---

XY: 59.25

DFOV: 230mm STANDARD

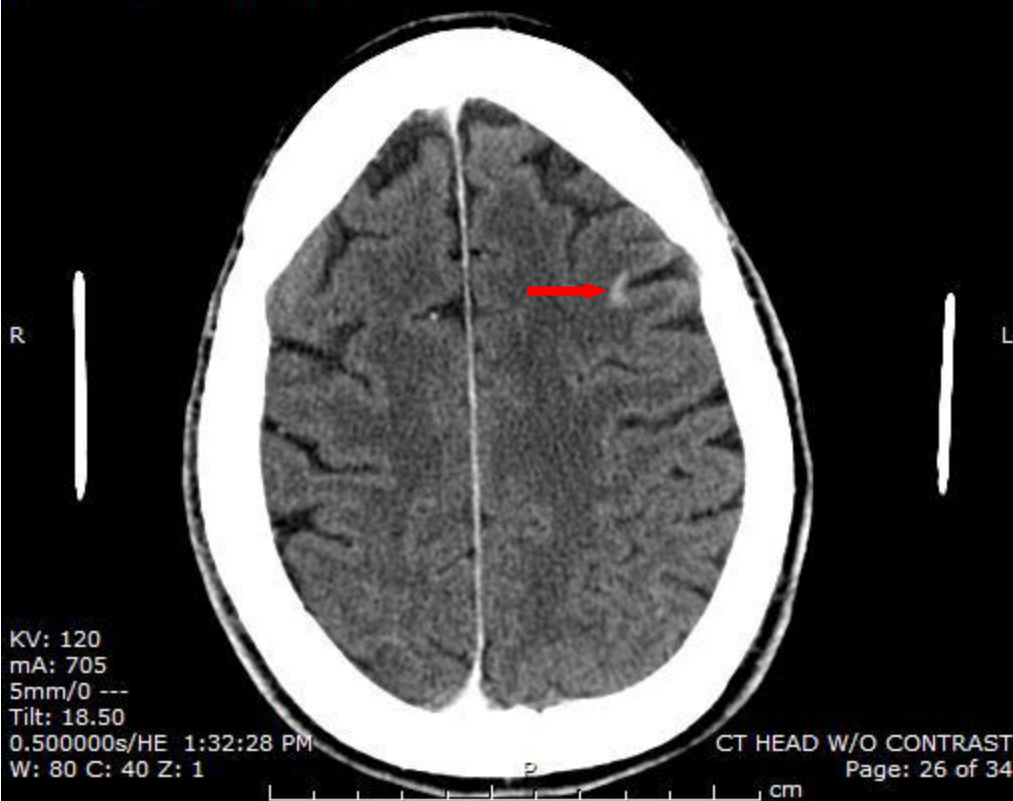

KV: 120

mA: 705

5mm/0 ---

Tilt: 18.50

0.500000s/HE 1:32:28 PM

W: 80 C: 40 Z: 1

CT HEAD W/O CONTRAST

Page: 26 of 34
